# Supplementary material for: The effect of forest cover changes on the regional climate conditions in Europe during the period 1986–2015
Source: Copernicus journal article supplement (doi:10.5194/bg-21-811-2024), 2024-02-15
Supplement: Supplementary file 1 [file bg-21-811-2024-supplement.pdf]

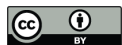

*Supplement of*

## **The effect of forest cover changes on the regional climate conditions in Europe during the period 1986–2015**

**Marcus Breil et al.**

*Correspondence to:* Marcus Breil ([marcus.breil@uni-hohenheim.de](mailto:marcus.breil@uni-hohenheim.de))

The copyright of individual parts of the supplement might differ from the article licence.

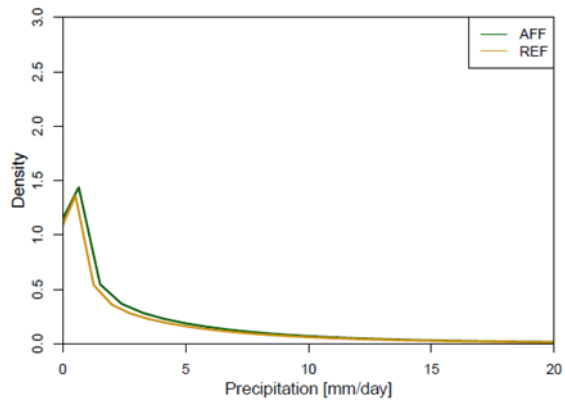

S1: Effects of afforestation on summertime precipitation extremes in Europe for the period 1986-2015. Differences in precipitation extremes with afforestation are shown with the probability distribution of daily precipitation sums in summer.

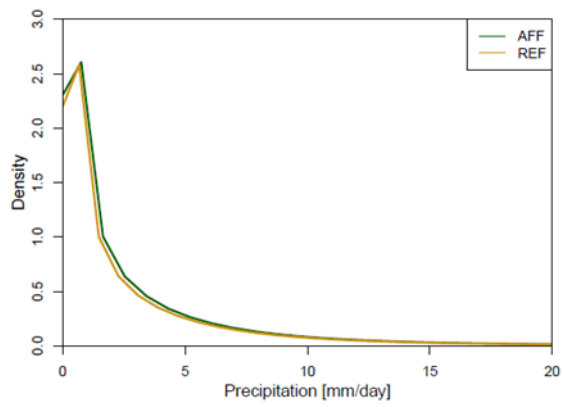

S2: Effects of afforestation on wintertime precipitation extremes in Europe for the period 1986-2015. Differences in precipitation extremes with afforestation are shown with the probability distribution of daily precipitation sums in winter.
